# Supplementary material
Source: publisher figshare collection journal article supplement (https://gsapubs.figshare.com/ndownloader/files/23291474)
Supplement: Supplementary file 1 [file 23291474]

## SUPPLEMENTAL INFORMATION

**Discussion of Isotopic Effects**

Many factors can affect the stable isotopic composition of mineral proxies. The following is a discussion of these effects and a rationale for why we interpret the variation seen in the isotopic record of the Cenozoic North American Cordillera as elevation change and accompanying changes in seasonality of precipitation.

***Latitude and Continentality Effects:*** Precipitation at higher latitudes becomes progressively more depleted in  $^{18}\text{O}$  and D (Craig, 1961). In the eastern continental U.S., this occurs at a gradient of  $\sim 0.4\text{‰}/\text{km}$  for oxygen isotopes (Kendall and Coplen, 2001). In the western U.S., however, isotopic values appear to be dominantly controlled by elevation and air masses. On the west coast of North America, for example,  $\delta^{18}\text{O}$  values in southern Washington and southern California are both  $-6$  to  $-8\text{‰}$ . Furthermore, western North America has remained at approximately the same latitude in the Cenozoic (Smith et al., 1981) so it is unlikely that any of the major findings here can be attributed to changes in the latitude with time.

Isotopic composition is affected by inland distance because an air mass will become progressively depleted as it rains out. This is the same effect produced by an orographic barrier and the composition of precipitation will follow a Rayleigh fractionation curve. There has been a change in continentality as the western U.S. has undergone significant extension since the Eocene. However, even a change of 400 km (accounting for 100 % extension from northwestern Utah to the western U.S. coast) would only produce a  $\sim 0.8\text{‰}$  increase in  $\delta^{18}\text{O}_p$  prior to extension assuming  $0.002\text{‰}/\text{km}$  (Criss, 1999). This isotopic increase is not of the magnitude to affect any of the conclusions presented in this work.

***Temperature Effects:*** Temperature does affect mineral-water fractionation factors. Fractionation is usually greater at colder temperatures. This effect has already been accounted for in the conversion from mineral proxy values to paleoprecipitation values. In these calculations, we used temperature estimates from paleofloral indicators and interpolated between known values. While the temperature estimates may be rough, the temperature effect is small compared to the magnitude of the variation observed in the isotopic record. For example, in the calcite-water oxygen isotope system, a misestimate of  $15\text{ °C}$  instead of  $25\text{ °C}$  MAT would only result in  $\sim 2\text{‰}$  of change in  $\delta^{18}\text{O}_p$ . Temperature can also affect global ice volume, which in turn affects isotopic composition of the oceans because ice sequestered at the poles is relatively depleted in  $^{18}\text{O}$  and D. Therefore, modern oceans would be relatively  $^{18}\text{O}$ - and D-rich compared to the ice-free Eocene. Lack of ice caps in the Eocene would produce lower  $\delta^{18}\text{O}_p$  of the initial air mass and therefore the proxy isotopic composition. However, since global temperatures were higher in the Eocene, the magnitude of fractionation would decrease, leading to mineral proxies with higher  $\delta^{18}\text{O}$  values. The combined competing effects of temperature and

ice volume only changed marine carbonate composition by ~0.8-1.0 ‰ in oxygen (Zachos et al., 2001)

**Evaporative Effects:** Evaporation can significantly affect the composition of samples by enriching surface waters in  $^{18}\text{O}$  and D. This effect can produce isotopic shifts on the order of major elevation changes, so precautions need to be taken in order to eliminate changes in evaporation from being misinterpreted as elevation changes. The most obvious evidence for evaporative alteration would be the presence of evaporite minerals. These minerals are not present in the sections examined here, with the exception of some excluded sections from Laramide intraforeland lakes (Davis et al., 2008; Davis et al., 2009a; Davis et al., 2009b). Second, in lacustrine rocks and paleosols, other geochemical indicators such as high Mg/Ca and Sr/Ca ratios or  $\delta^{13}\text{C}$ - $\delta^{18}\text{O}$  covariance in calcite may indicate evaporative environments. Carbon and oxygen isotope ratios can covary because hydrologically closed lakes have longer residence times, leading to more  $\text{CO}_2$  outgassing. Since  $^{12}\text{C}$ -rich  $\text{CO}_2$  preferentially outgases, the lake will become enriched in  $^{13}\text{C}$ . Likewise, the lake will be enriched in  $^{18}\text{O}$  due to preferential evaporation of  $^{16}\text{O}$ -rich  $\text{H}_2\text{O}$ . Mg and Sr will also become enriched in lakes, as they are not flushed from hydrologically closed lakes leading to high Mg/Ca and Sr/Ca ratios in calcite. This type of secondary analysis has not been done for all lacustrine and paleosol samples in this study, but a large subset of the samples used in this study used trace elements to examine evaporative effects (Horton et al., 2004; Kent-Corson et al., 2006; Davis et al., 2008; Davis et al., 2009a; Davis et al., 2009b). Sections suspected of high evaporation due to any of the above reasons were excluded from this study.

**Diagenetic Effects:** The isotopic composition of authigenic minerals is sensitive to alteration due to burial, cementation, replacement or other diagenetic effects. The most important analysis for diagenetic effects comes from field observations. The new isotopic data presented in this paper excludes any samples that contained sparry calcite, secondary calcite veins, or calcite within vugs. In addition, the published data used in this study is subject to the judgment of many authors' work cited in this paper, and none of the published data used here was suspected of diagenetic alteration.

**Climate Effects:** The stable isotopic composition of precipitation represents the sum of many complex climatic effects. Unraveling the relationship between elevation change and regional/global climate change is, at best, difficult. Ultimately, surface uplift produces isotopic shifts that reflect changes in local atmospheric circulation and drainage reorganization, so even the target isotopic signal for surface elevation represents the inseparable coupling of tectonics and climate. There are several reasons why we can discount changes in global climate for the isotopic patterns presented in this study. First, since the data presented here are calculated precipitation values, changes in temperature between bins or regions have already been taken into account. Moreover, the cooling that occurred at the Eocene/Oligocene boundary in North America (~8°; (Zanazzi et al., 2007) would cause a decrease of ~4 ‰ in  $\delta^{18}\text{O}_\text{p}$  (Rozanski et al., 1993). However, this isotopic effect should affect all samples across the study area in this time bin rather than the diachronous isotopic shifts that we observe.

Second, global climate change could affect values through a major change in atmospheric circulation patterns. However, we do not think that a rearrangement of the air masses other than the North American Monsoon played a role in the isotopic patterns we observe. The western U.S. is affected by four major air masses. Today, maritime polar, maritime tropical and continental air masses account for 92 % of the precipitation received by the Great Basin (Friedman et al., 2002). These three air masses are all within ~1 ‰ of each other in oxygen, so changes in the relative amounts of precipitation from these air masses would not produce the large isotopic changes we observe between time bins presented in this study. The remaining 8 % of precipitation to the Great Basin comes from the Arctic, which is ~6-7 ‰ lower than the other three primary air masses. However, it is unlikely that the north to south changes we observe in  $\delta^{18}\text{O}$  values of precipitation can be attributed to southward migration of the Arctic air mass. The Arctic air mass would have to be responsible for increasing influence from north to south during the Eocene, a relatively warm period when it would have been less active at these latitudes. In addition, changes in atmospheric circulation would not likely manifest as the rapid negative shifts seen in the Sage Creek and Elko Basins as this would involve a complete change to Arctic-sourced moisture in a relatively warm period of time. Finally, the isotopic records show that precipitation had relatively low  $\delta^{18}\text{O}$  in the Eocene and Oligocene before increasing in the late Miocene to Holocene (Horton et al., 2004; Horton and Chamberlain, 2006; Kent-Corson et al., 2006) during a period of global cooling. Again, increased influence of the Arctic air mass would be expected in cooler times, but the isotopic records from the Miocene to Holocene trend toward increasing  $\delta^{18}\text{O}$  values as cooling progressed.

As we discussed in the paper, monsoonal effects likely played a role in changing the isotopic composition of precipitation across the study area. Currently,  $^{18}\text{O}$ - and D-enriched precipitation from the Gulfs of Mexico and California arrives in the western US in summer monsoonal storms. Less than 5 % of the precipitation reaching central Utah and none in eastern Nevada originate from the Gulf of Mexico (Friedman et al., 2002). The lack of monsoonal storms in this region is due to the orographic barrier created by the Rocky Mountains and the high elevations of the Great Basin. Monsoonal effects are more apparent east of the Rocky Mountains as well as in the American Southwest. In the Eocene, monsoonal storms may have pushed farther north than in the modern. We argue this for several reasons: 1) Warmer temperatures of the Eocene would have increased the moisture carrying capacity of the atmosphere. 2) The Mississippi Embayment extended into Colorado in the Eocene and, thus, the moisture source for the summer monsoon was closer to the Cordillera than in the modern. 3) Since we argue that high topography in much of the Great Basin had not yet formed, there would be fewer orographic barriers preventing monsoonal precipitation from continuing north, although it appears that many of the Rocky Mountain Laramide uplifts were high at this time (Fan and Dettman, 2009). This may be part of the reason for  $^{18}\text{O}$  and D-rich precipitation in Nevada, Utah, Colorado, and Wyoming shown in this study before 49 Ma. 4) Results from climate models suggest an intensified monsoon in the late Cretaceous (Fricke et al., 2010) and Eocene (Sewall and Sloan, 2006).

## **Extended Methods**

***Conversion to  $\delta^{18}\text{O}$  of Precipitation:*** We began with raw isotopic values for various mineral proxies. These values were converted with the appropriate fractionation equation (see below). For calcite and smectite values, we assigned the temperatures needed for the fractionation equations based on paleofloral estimates, and when necessary, interpolated temporally using the Cenozoic temperature history for mid-latitude ( $45^\circ$ ) coastal North America (Wolfe, 1994). Some studies have already calculated  $\delta^{18}\text{O}_p$  using similar methodology. In the cases of the muscovite and aragonite values included in this compilation, we used the authors' calculated water value. The fractionation factor for glass is not temperature dependent, so in this case, we simply converted to water values without temperature estimates. In the case of glass, muscovite and kaolinite, the raw data were hydrogen isotopic values. In these cases, after conversion to the isotopic composition of precipitation,  $\delta\text{D}$  values were converted to  $\delta^{18}\text{O}$  using the meteoric water line.

### *Fractionation equations used:*

Calcite—Kim and O'Neil, 1997

Smectite—Capuano, 1992, and Sheppard and Gilg, 1996

Kaolinite—Gilg and Sheppard, 1996

Glass—Friedman et al., 1993

### *Other components of the conversion:*

Cenozoic mid-latitude temperature history—Wolfe, 1994

Meteoric water line—Craig, 1961

***Calculation of Paleoelevations:*** Paleoelevations were calculated using a single moisture source Rayleigh distillation model (Rowley et al., 2001). We used Eocene relative humidity and sea surface temperatures from Huber and Caballero (2003). The error cited with these estimates includes the uncertainty of the isotopic lapse rate that is calculated from randomly sampling 1000 pairs of relative humidity and mean annual temperature from the output of the Eocene climate model and calculating the change in isotopic composition of precipitation during orographic ascent (Rowley, 2007). For our calculations we used a starting  $\delta^{18}\text{O}_p$  determined from the  $\delta^{18}\text{O}$  of Eocene kaolinites ( $\delta^{18}\text{O}_p = -9.9\text{‰}$ ) located at the Eocene Pacific shoreline (Mulch et al., 2006). Our modeled elevations assume the primary vapor source for these samples was from the Pacific, as it is today.

## SUPPLEMENTAL REFERENCES

- Bowen, G.J., Koch, P.L., Gingerich, P.D., Norris, R.D., Bains, S., and Corfield, R.M., 2001, Refined isotope stratigraphy across the continental Paleocene-Eocene boundary on Polecat Bench in the northern Bighorn Basin; Paleocene-Eocene stratigraphy and biotic change in the Bighorn and Clarks Fork basins, Wyoming: International conference on Climate and biota of the early Paleogene, Powell, WY, United States, July 3-8, 2001, v. 33, p. 73-88.
- Bowen, G.J., Daniels, A.L., and Bowen, B.B., 2008, Paleoenvironmental isotope geochemistry and paragenesis of lacustrine and palustrine carbonates, Flagstaff Formation, central Utah, USA: *Journal of Sedimentary Research*, v. 78, p. 162-174.
- Bowen, G.J., and Bowen, B.B., 2008, Mechanisms of PETM global change constrained by a new record from central Utah: *Geology*, v. 36, p. 379-382.
- Capuano, R.M., 1992, The temperature dependence of Hydrogen Isotope Fractionation between Clay Minerals and Water: Evidence from a geopressurized system: *Geochimica Cosmochimica Acta*, v. 56, p. 2547-2554.
- Carroll, A.R., Doebbert, A.C., Booth, A.L., Chamberlain, C.P., Rhodes-Carson, M.K., Smith, M.E., Johnson, C.M., and Beard, B.L., 2008, Capture of high-altitude precipitation by a low-altitude Eocene lake, western U.S: *Geology*, v. 36, p. 791-794.
- Cassel, E.J., Graham, S.A., and Chamberlain, C.P., 2009, Cenozoic tectonic and topographic evolution of the northern Sierra Nevada, California, through stable isotope paleoaltimetry in volcanic glass: *Geology*, v. 37, p. 547-550.
- Chase, C.G., Gregory-Wodzicki, K.M., Parrish-Jones, J.T., and DeCelles, P.G., 1998, Topographic history of the western Cordillera of North America and controls on climate, in Crowley, T.J., and Burke, K., eds., *Tectonic boundary conditions for climate model simulations*: New York, Oxford University Press, p. 73-99.
- Clyde, W.C., Sheldon, N.D., Koch, P.L., Gunnell, G.F., and Bartels, W.S., 2001, Linking the Wasatchian/Bridgerian boundary to the Cenozoic Global Climate Optimum: new magnetostratigraphic and isotopic results from South Pass, Wyoming: *Palaeogeography, Palaeoclimatology, Palaeoecology*, v. 167, p. 175-199.
- Craig, H., 1961, Isotopic variations in meteoric waters: *Science*, v. 133, p. 1702-1703.
- Criss, R.E., 1999, *Principles of stable isotope distribution*: New York, Oxford University Press, 254 p.
- Davis, S.J., Mix, H.T., Wiegand, B.A., Carroll, A.R., and Chamberlain, C.P., 2009a, Synorogenic evolution of large-scale drainage patterns: Isotope paleohydrology of sequential Laramide basins: *American Journal of Science*, v. 309, p. 549-602.
- Davis, S.J., Mulch, A., Carroll, A.R., Horton, T.W., and Chamberlain, C.P., 2009b, Paleogene landscape evolution of the central North American Cordillera: Developing topography and hydrology in the Laramide foreland: *Geological Society of America Bulletin*, v. 121, p. 100-116.
- Davis, S.J., Wiegand, B.A., Carroll, A.R., and Chamberlain, C.P., 2008, The effect of drainage reorganization on paleoaltimetry studies: An example from the Paleogene Laramide foreland: *Earth and Planetary Science Letters*, v. 275, p. 258-268.
- Dettman, D.L., and Lohmann, K.C., 2000, Oxygen isotope evidence for high-altitude

- snow in the Laramide Rocky Mountains of North America during the Late Cretaceous and Paleogene: *Geology*, v. 28, p. 243-246.
- Fan, M., and Dettman, D.L., 2009, Late Paleocene high Laramide ranges in northeast Wyoming: Oxygen isotope study of ancient river water: *Earth and Planetary Science Letters*, v. 286, p. 110-121.
- Fricke, H.C., Foreman, B.Z., and Sewall, J.O., 2010, Integrated climate model-oxygen isotope evidence for a North American monsoon during the Late Cretaceous: *Earth and Planetary Science Letters*, v. 289, p. 11-21.
- Friedman, I., Harris, J.M., Smith, G.L., and Johnson, C.A., 2002, Stable isotope composition of waters in the Great Basin, United States 1. Air-mass trajectories: *Journal of Geophysical Research*, v. 107(DX), p. ACL 14-1 14-13.
- Friedman, I., Gleason, J., Sheppard, R.A., and Gude, A.J.r., 1993, Deuterium Fractionation as Water Diffuses into Silicic Volcanic Ash, *in* Union, A.G., ed., *Climate Change in Continental Isotopic Records*, Volume Geophysical Monograph 78.
- Gilg, H.A., and Sheppard, S.M.F., 1996, Hydrogen isotope fractionation between kaolinite and water revisited: *Geochimica et Cosmochimica Acta*, v. 60, p. 529-533.
- Horton, T.W., and Chamberlain, C.P., 2006, Stable isotopic evidence for Neogene surface downdrop in the central Basin and Range province: *GSA Bulletin*, v. 118, p. 475-490.
- Horton, T.W., Sjostrom, D.J., Abruzzese, M.J., Poage, M.A., Waldbauer, J.R., Hren, M., Wooden, J., and Chamberlain, C.P., 2004, Spatial and temporal variation of Cenozoic surface elevation in the Great Basin and Sierra Nevada: *American Journal of Science*, v. 304, p. 862-888.
- Huber, M., and Caballero, R., 2003, Eocene El Nino: Evidence for Robust Tropical Dynamics in the "Hothouse": *Science*, v. 299, p. 877-881.
- Kendall, C., and Coplen, T.B., 2001, Distribution of oxygen-18 and deuterium in river waters across the United States: *Hydrological Processes*, v. 15, p. 1363-1393.
- Kent-Corson, M.L., Sherman, L.S., Mulch, A., and Chamberlain, C.P., 2006, Cenozoic topographic and climatic response to changing tectonic boundary conditions in Western North America: *Earth and Planetary Science Letters*, v. 252, p. 453-466.
- Kim, S.-T., and O'Neil, J.R., 1997, Equilibrium and nonequilibrium oxygen isotope effects in synthetic carbonates: *Geochimica et Cosmochimica Acta*, v. 61, p. 3461-3475.
- Koch, P.L., Zachos, J., and Dettman, D.L., 1995, Stable isotope stratigraphy and paleoclimatology of the Paleogene Bighorn Basin (Wyoming, USA): *Palaeogeography, Palaeoclimatology, Palaeoecology*, v. 115, p. 61-89.
- Morrill, C., and Koch, P.L., 2002, Elevation or alteration? Evaluation of isotopic constraints on paleoaltitudes surrounding the Eocene Green River Basin: *Geology*, v. 30, p. 151-154.
- Mulch, A., Graham, S.A., and Chamberlain, C.P., 2006, Hydrogen isotopes in Eocene river gravels and paleoelevation of the Sierra Nevada: *Science*, v. 313, p. 87-89.
- Mulch, A., Teyssier, C., Cosca, M.A., and Chamberlain, C.P., 2007, Stable isotope paleoaltimetry of Eocene Core Complexes in the North American Cordillera: *Tectonics*.

- Norris, R.D., Jones, L.S., Corfield, R.M., and Cartlidge, J.E., 1996, Skiing in the Eocene Uinta Mountains? Isotopic evidence in the Green River Formation for snow melt and large mountains: *Geology*, v. 24, p. 403-406.
- Rowley, D.B., Pierrehumbert, R.T., and Currie, B.S., 2001, A new approach to stable isotope-based paleoaltimetry: implications for paleoaltimetry and paleohypsometry of the High Himalaya since the Late Miocene: *Earth and Planetary Science Letters*, v. 188, p. 253-268.
- Rowley, D.B., 2007, Stable Isotope-Based Paleoaltimetry: Theory and Validation: *Reviews in Mineralogy and Geochemistry*, v. 66, p. 23-52.
- Rozanski, K., Araguas-Araguas, L., and Gonfiantini, R., 1993, Isotopic patterns in modern global precipitation, *Climate change in continental isotopic records*, Volume 78: Geophysical Monograph: Washington, DC, American Geophysical Union, p. 1-37.
- Sewall, J.O., and Sloan, L., 2006, Come a little bit closer: A high-resolution climate study of the early Paleogene Laramide foreland: *Geology*, v. 34, p. 81-84.
- Sheppard, S.M.F., and Gilg, H.A., 1996, Stable isotope geochemistry of clay minerals: *Clay Minerals*, v. 31, p. 1-24.
- Sjostrom, D.J., Hren, M., Horton, T.W., Waldbauer, J.R., and Chamberlain, C.P., 2006, Stable isotopic evidence for a pre-late Miocene elevation gradient in the Great Plains - Rocky Mountain Region, USA: *GSA Special Papers*, v. 398, p. 309-319.
- Smith, A.G., Hurley, A.M., and Briden, J.C., 1981, *Phanerozoic Paleogeographic World Maps*: New York, Cambridge University Press.
- Wolfe, J.A., Forest, C.E., and Molnar, P., 1998, Paleobotanical evidence of Eocene and Oligocene paleoaltitudes in midlatitude western North America: *GSA Bulletin*, v. 110, p. 664-678.
- Wolfe, J.A., 1994, Tertiary climatic changes at middle latitudes of western North America: *Palaeogeography, Palaeoclimatology, Palaeoecology*, v. 108, p. 195-205.
- Zachos, J., Pagani, M., Sloan, L., Thomas, E., and Billups, K., 2001, Trends, rhythms, and aberrations in global climate 65 Ma to Present: *Science*, v. 292, p. 686-693.
- Zanazzi, A., Kohn, M.J., MacFadden, B.J., and Terry, D.O., 2007, Large temperature drop across the Eocene-Oligocene transition in central North America: *Nature*, v. 445, p. 639-642.

Supplemental Table DR1. Isotopic Values used in Compilation

## Bin 1: Pre-49 Ma

| Region                         | Latitude | Longitude | Age<br>Ma | Mean $\delta^{18}\text{O}$<br>VSMOW | Material  | Mean T<br>°C | $\delta^{18}\text{O}_p$<br>VSMOW | 1 $\sigma$ $\delta^{18}\text{O}_p$ | n   | Study                     |
|--------------------------------|----------|-----------|-----------|-------------------------------------|-----------|--------------|----------------------------------|------------------------------------|-----|---------------------------|
| Axehandle Basin (UT)           | 39.41    | -111.70   | 55        | 22.0                                | Calcite   | 22†          | -6.7                             | 1.2                                | 262 | Bowen and Bowen, 2008     |
| Axehandle Basin (UT)           | 39.40    | -111.68   | 71.3-50   | 21.0                                | Calcite   | 16.9†        | -8.3                             | 2.0                                | 95  | This study                |
| Bannock Basin (ID)             | 42.09    | -112.18   | 50-49     | 16.4                                | Calcite   | 12.5*        | -14.3                            |                                    | 2   | This study                |
| Bighorn Basin (WY)             | 45.00    | -109.00   | 57.7-53.2 | 22.1                                | Calcite   | 16*          | -7.8                             | 0.5                                | 90  | Koch et al., 1995         |
| Bighorn Basin (WY)             | 44.00    | -108.80   | 58.8-53.6 |                                     | Aragonite | §            | -10.3                            | 0.8                                | 272 | Dettman and Lohmann, 2000 |
| Bighorn Basin (WY)             | 44.84    | -108.84   | 55.8      | 21.6                                | Calcite   | 16.5*        | -7.9                             | 0.6                                | 338 | Bowen et al., 2001        |
| Bighorn Basin (WY)             | 42.22    | -108.53   | 50.8-51.9 | 21.6                                | Calcite   | 17.5*        | -7.1                             | 3.0                                | 118 | Clyde et al., 2001        |
| Crazy Mtn Basin (MT)           | 46.40    | -110.20   | 64.4-59.4 |                                     | Aragonite | §            | -13.8                            | 1.2                                | 45  | Dettman and Lohmann, 2000 |
| Elko Basin (NV)                | 40.56    | -116.01   | 54.5-49.0 | 25.0                                | Calcite   | 21.5*        | -4.0                             | 1.1                                | 11  | Horton et al., 2004       |
| Flagtaff Basin (UT)            | 39.00    | -110.50   | 55        | 21.7                                | Calcite   | 22†          | -7.0                             | 0.9                                | 48  | Bowen et al., 2008        |
| Great Plains/Rocky Mts         | 43.83    | -108.55   | 50        | 15.8                                | Smectite  | 10.9*        | -11.8                            |                                    | 2   | Sjostrom et al., 2006     |
| Greater Green River Basin (WY) | 40.76    | -108.89   | 51.8-52.0 |                                     | Aragonite | §            | -7.4                             | 1.8                                | 59  | Dettman and Lohmann, 2000 |
| Greater Green River Basin (WY) | 41.50    | -109.00   | 53        |                                     | Aragonite | §            | -8.0                             | 0.6                                | 31  | Morrill and Koch, 2002    |
| Greater Green River Basin (WY) | 41.50    | -109.00   | 54        |                                     | Aragonite | §            | -10.6                            | 0.7                                | 59  | Morrill and Koch, 2002    |
| Greater Green River Basin (WY) | 41.50    | -109.00   | 51        |                                     | Aragonite | §            | -9.4                             | 0.9                                | 48  | Morrill and Koch, 2002    |
| Greater Green River Basin (WY) | 41.75    | -108.80   | 49        | 27.0                                | Calcite   | 17.2†        | -2.7                             | 1.3                                | 79  | Carroll et al., 2008      |
| Greater Green River Basin (WY) | 41.50    | -109.50   | 52        | 28.3                                | Calcite   | 17.2†        | -1.4                             | 0.7                                | 151 | Norris et al., 1996       |
| Okanagan-Kettle MCC (WA)       | 48.50    | -118.25   | 49.1      |                                     | Muscovite | §            | -13.3                            | -0.9                               | 8   | Mulch et al., 2007        |
| Piceance Creek Basin (CO)      | 39.41    | -108.18   | 52        | 20.3                                | Calcite   | 22†          | -8.4                             | 3.9                                | 42  | Davis et al., 2009        |
| Powder River Basin (WY)        | 45.50    | -106.00   | 53.7-57.3 |                                     | Aragonite | §            | -13.7                            | 4.2                                | 110 | Dettman and Lohmann, 2000 |
| Princeton Basin (BC)           | 49.44    | -120.50   | 49        | 11.0                                | Calcite   | 8.3†         | -19.7                            | 1.7                                | 21  | This study                |
| Sage Creek Basin (MT/ID)       | 44.74    | -112.61   | 65-49     | 22.2                                | Calcite   | 11-16*       | -8.4                             | 1.7                                | 14  | Kent-Corson et al., 2006  |
| Shuswap MCC (BC)               | 51.00    | -118.25   | 49.0-47.9 |                                     | Muscovite | §            | -15.8                            | -0.1                               | 16  | Mulch et al., 2007        |
| Uinta Basin (UT)               | 39.81    | -110.94   | 55        | 18.9                                | Calcite   | 22†          | -9.8                             | 1.9                                | 93  | Davis et al., 2008        |
| Wind River Range (WY)          | 43.24    | -107.50   | 52.8-52.0 | 16.3                                | Calcite   | 16.5*        | -13.6                            | 4.8                                | 16  | This study                |
| Wind River Range (WY)          | 43.33    | -107.63   | 53.2-52.7 | 17.2                                | Calcite   | 17.5*        | -12.6                            | 5.8                                | 21  | This study                |
| Wind River Range (WY)          | 43.49    | -109.45   | 55.5-53.2 | 20.6                                | Calcite   | 19.8*        | -8.5                             | 3.9                                | 22  | This study                |
| Wind River Range (WY)          | 43.02    | -107.08   | 60-55     | 19.4                                | Calcite   | 21.5*        | -9.3                             | 2.0                                | 10  | This study                |
| Wind River Range (WY)          | 43.22    | -107.30   | 52-50.9   | 15.9                                | Calcite   | 16.5*        | -13.9                            | 3.8                                | 15  | This study                |

\* Chase et al., 1998



Supplemental Table DR1. Isotopic Values used in Compilation

† Wolfe et al., 1997

§ Used author's calculated water value

**Bin 2: 49 to 39 Ma**

| Region                         | Latitude | Longitude | Age<br>Ma | Mean $\delta^{18}\text{O}$<br>VSMOW | Material  | Mean T<br>°C | $\delta^{18}\text{O}_p$<br>VSMOW | 1 $\sigma$ $\delta^{18}\text{O}_p$ | n  | Study                    |
|--------------------------------|----------|-----------|-----------|-------------------------------------|-----------|--------------|----------------------------------|------------------------------------|----|--------------------------|
| Bannock Basin (ID)             | 42.09    | -112.18   | 48-41     | 18.5                                | Calcite   | 12.3*        | -12.3                            | 1.4                                | 6  | This study               |
| Elko Basin (NV)                | 40.56    | -116.02   | 47.5-39.4 | 22.4                                | Calcite   | 15.8*        | -6.7                             | 2.9                                | 19 | Horton et al., 2004      |
| Elko Basin (NV)                | 40.58    | -115.99   | 42.6-40.6 | 26.6                                | Calcite   | 12.4*        | -4.1                             | 4.7                                | 21 | This study               |
| Flagstaff Basin (UT)           | 38.92    | -111.81   | 49-39     | 21.8                                | Calcite   | 13.2*        | -8.7                             | 5.7                                | 56 | Davis et al., 2008       |
| Galisteo Basin (NM)            | 35.50    | -106.00   | 49-39     | 21.9                                | Calcite   | 7.5*         | -10.0                            | 1.2                                | 36 | Davis et al., 2009       |
| Great Plains/Rocky Mts         | 43.50    | -108.58   | 47.9      | 14.9                                | Smectite  | 10*          | -12.9                            | 0.5                                | 3  | Sjostrom et al., 2006    |
| Great Plains/Rocky Mts         | 42.76    | -107.59   | 49        | 14.2                                | Smectite  | 10.9*        | -13.4                            |                                    | 2  | Sjostrom et al., 2006    |
| Great Plains/Rocky Mts         | 42.71    | -108.18   | 49        | 14.4                                | Smectite  | 10.9*        | -13.2                            |                                    | 2  | Sjostrom et al., 2006    |
| Great Plains/Rocky Mts         | 42.60    | -108.29   | 49        | 15.7                                | Smectite  | 10.9*        | -11.9                            |                                    | 1  | Sjostrom et al., 2006    |
| Great Plains/Rocky Mts         | 44.85    | -110.16   | 49        | 9.1                                 | Smectite  | 10.9*        | -18.5                            |                                    | 2  | Sjostrom et al., 2006    |
| Great Plains/Rocky Mts         | 44.87    | -111.05   | 49        | 10.2                                | Smectite  | 10.9*        | -17.4                            |                                    | 2  | Sjostrom et al., 2006    |
| Great Plains/Rocky Mts         | 44.89    | -111.33   | 49        | 9.5                                 | Smectite  | 10.9*        | -18.1                            |                                    | 2  | Sjostrom et al., 2006    |
| Greater Green River Basin (WY) | 41.75    | -108.80   | 48        | 22.5                                | Calcite   | 17.2†        | -7.2                             | 1.2                                | 57 | Carroll et al., 2008     |
| Ibapah Basin (UT)              | 40.12    | -114.12   | 46-39     | 19.8                                | Calcite   | 13.2*        | -10.8                            | 2.2                                | 21 | Davis et al., 2009       |
| Sage Creek Basin (MT/ID)       | 44.66    | -112.58   | 48.0-39.1 | 13.5                                | Calcite   | 13.4*        | -17.1                            | 1.8                                | 58 | Kent-Corson et al., 2006 |
| Sierra Nevada (CA)             | 39.35    | -120.98   | 44.9      |                                     | Kaolinite | 17.1*        | -9.3                             | 0.5                                | 25 | Mulch et al., 2006       |
| Sierra Nevada (CA)             | 39.18    | -120.85   | 44.9      |                                     | Kaolinite | 17.1*        | -10.1                            |                                    | 2  | Mulch et al., 2006       |
| Sierra Nevada (CA)             | 39.69    | -120.93   | 44.9      |                                     | Kaolinite | 17.1*        | -10.0                            | 0.0                                | 5  | Mulch et al., 2006       |
| Sierra Nevada (CA)             | 39.69    | -120.98   | 44.9      |                                     | Kaolinite | 17.1*        | -9.8                             |                                    | 2  | Mulch et al., 2006       |
| Uinta Basin (UT)               | 40.05    | -110.53   | 49-39     | 27.0                                | Calcite   | 13.2*        | -3.6                             | 2.8                                | 76 | Davis et al., 2008       |

\* Chase et al., 1998

† Wolfe et al., 1997

§ Used author's calculated water value

Supplemental Table DR1. Isotopic Values used in Compilation

**Bin 3: 39 to 28 Ma**

| Region                   | Latitude | Longitude | Age<br>Ma | Mean $\delta^{18}\text{O}$<br>VSMOW | Material | Mean T<br>°C | $\delta^{18}\text{O}_p$<br>VSMOW | $1\sigma$ $\delta^{18}\text{O}_p$ | n  | Study                    |
|--------------------------|----------|-----------|-----------|-------------------------------------|----------|--------------|----------------------------------|-----------------------------------|----|--------------------------|
| Claron Basin (UT)        | 37.68    | -112.83   | 39-28     | 14.8                                | Calcite  | 11*          | -16.3                            | 1.4                               | 34 | Davis et al., 2008       |
| Copper Basin (NV)        | 41.76    | -115.47   | 38.7      | 9.6                                 | Smectite | 10.5†        | -18.2                            | 3.2                               | 8  | This study               |
| Elko Basin (NV)          | 40.55    | -115.96   | 36.0-28.0 | 14.5                                | Calcite  | 13*          | -16.1                            | 1.5                               | 10 | Horton et al., 2004      |
| Flastaff Basin (UT)      | 38.93    | -111.95   | 39-28     | 15.4                                | Calcite  | 11*          | -15.7                            | 0.4                               | 11 | Davis et al., 2008       |
| Galisteo Basin (NM)      | 35.50    | -106.00   | 39-28     | 21.8                                | Calcite  | 0*           | -11.8                            | 0.9                               | 16 | Davis et al., 2009       |
| Great Plains/Rocky Mts   | 42.83    | -101.70   | 35        | 17.7                                | Smectite | 11.5*        | -9.8                             |                                   | 1  | Sjostrom et al., 2006    |
| Great Plains/Rocky Mts   | 43.66    | -102.66   | 35.8      | 19.4                                | Smectite | 11.5*        | -8.1                             | 0.8                               | 5  | Sjostrom et al., 2006    |
| Great Plains/Rocky Mts   | 41.60    | -103.11   | 31.25     | 18.2                                | Smectite | 11.5*        | -9.2                             | 1.0                               | 6  | Sjostrom et al., 2006    |
| Great Plains/Rocky Mts   | 41.70    | -103.34   | 31.25     | 18.9                                | Smectite | 11.5*        | -8.6                             | 0.4                               | 2  | Sjostrom et al., 2006    |
| Great Plains/Rocky Mts   | 42.92    | -103.49   | 34.5      | 16.9                                | Smectite | 11.5*        | -10.6                            |                                   | 1  | Sjostrom et al., 2006    |
| Great Plains/Rocky Mts   | 42.77    | -103.56   | 30.3      | 17.0                                | Smectite | 11.5*        | -10.5                            |                                   | 2  | Sjostrom et al., 2006    |
| Great Plains/Rocky Mts   | 42.76    | -105.01   | 35.5      | 16.6                                | Smectite | 11.5*        | -10.9                            |                                   | 1  | Sjostrom et al., 2006    |
| Great Plains/Rocky Mts   | 42.71    | -105.37   | 31.25     | 14.7                                | Smectite | 11.5*        | -12.8                            |                                   | 1  | Sjostrom et al., 2006    |
| Great Plains/Rocky Mts   | 42.64    | -106.76   | 35.65     | 14.1                                | Smectite | 11.5*        | -13.3                            | 0.5                               | 12 | Sjostrom et al., 2006    |
| Great Plains/Rocky Mts   | 42.76    | -107.56   | 32        | 10.9                                | Smectite | 11.5*        | -16.6                            |                                   | 1  | Sjostrom et al., 2006    |
| Great Plains/Rocky Mts   | 42.58    | -108.29   | 32        | 10.6                                | Smectite | 11.5*        | -16.9                            |                                   | 1  | Sjostrom et al., 2006    |
| Sage Creek Basin (MT/ID) | 44.76    | -112.55   | 38.8-32.0 | 14.1                                | Calcite  | 10.8*        | -17.0                            | 1.0                               | 36 | Kent-Corson et al., 2006 |
| Sierra Nevada (CA)       | 39.70    | -120.99   | 28.5      |                                     | Glass    |              | -14.3                            |                                   | 1  | Cassel et al., 2009      |
| Sierra Nevada (CA)       | 39.85    | -120.35   | 28.5      |                                     | Glass    |              | -16.8                            | 0.6                               | 8  | Cassel et al., 2009      |
| Sierra Nevada (CA)       | 39.25    | -120.93   | 28.5      |                                     | Glass    |              | -13.2                            | 0.3                               | 8  | Cassel et al., 2009      |
| Sierra Nevada (CA)       | 39.46    | -120.49   | 28.5      |                                     | Glass    |              | -15.3                            | 0.8                               | 11 | Cassel et al., 2009      |
| Sierra Nevada (CA)       | 39.56    | -120.50   | 28.5      |                                     | Glass    |              | -16.2                            |                                   | 2  | Cassel et al., 2009      |
| Sierra Nevada (CA)       | 38.19    | -120.85   | 28.5      |                                     | Glass    |              | -10.6                            |                                   | 2  | Cassel et al., 2009      |

Supplemental Table DR1. Isotopic Values used in Compilation

|                       |       |         |           |      |         |       |       |     |    |                    |
|-----------------------|-------|---------|-----------|------|---------|-------|-------|-----|----|--------------------|
| Uinta Basin (UT)      | 40.33 | -109.53 | 39-28     | 17.7 | Calcite | 11*   | -13.4 | 3.5 | 40 | Davis et al., 2008 |
| Wind River Range (WY) | 42.70 | -108.19 | 36.8-28.3 | 16.8 | Calcite | 11.3* | -14.1 | 1.7 | 36 | This study         |
| Wind River Range (WY) | 43.34 | -107.48 | 37.0-34.0 | 19.8 | Calcite | 11.5* | -11.1 | 1.4 | 8  | This study         |

\* Chase et al., 1998

† Wolfe et al., 1997

§ Used author's calculated water value
